# Supplementary material for: Pathological Evaluation of Resected Colorectal Liver Metastases: mFOLFOX6 Plus Bevacizumab versus mFOLFOX6 Plus Cetuximab in the Phase II ATOM Trial
Source: MDPI journal article supplement (doi:10.3390/cancers14184392), 2022-09-09
Supplement: s1 [file s1]

## Supplementary Materials

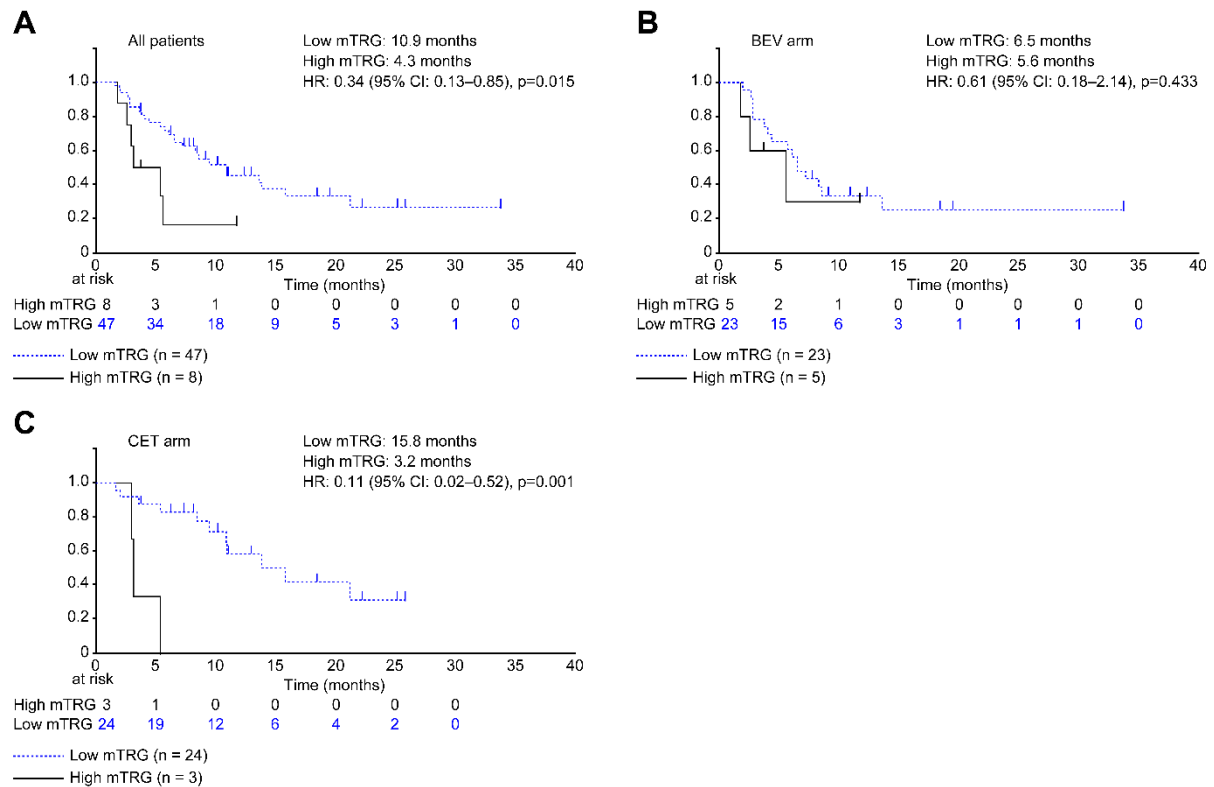

**Supplementary Figure S1.** Kaplan–Meier curves for relapse-free survival (RFS, time to relapse after resection) according to the modified tumor regression grade (mTRG). Curves are shown for all patients (A), patients in the bevacizumab (BEV) arm (B), and patients in the cetuximab (CET) arm (C). Relative to patients with high mTRG, patients with low mTRG had significantly better RFS (median: 4.3 months vs. 10.9 months; hazard ratio [HR]: 0.34, 95% confidence interval [CI]: 0.13–0.85;  $P = 0.015$ ). Similarly, relative to high mTRG, low mTRG was associated with insignificantly better RFS in the BEV arm (median: 5.6 months vs. 6.5 months; HR: 0.61, 95% CI: 0.18–2.14;  $P = 0.433$ ) and significantly better RFS in the CET arm (median: 3.2 months vs. 15.8 months; HR: 0.11, 95% CI: 0.02–0.52;  $P = 0.001$ ).

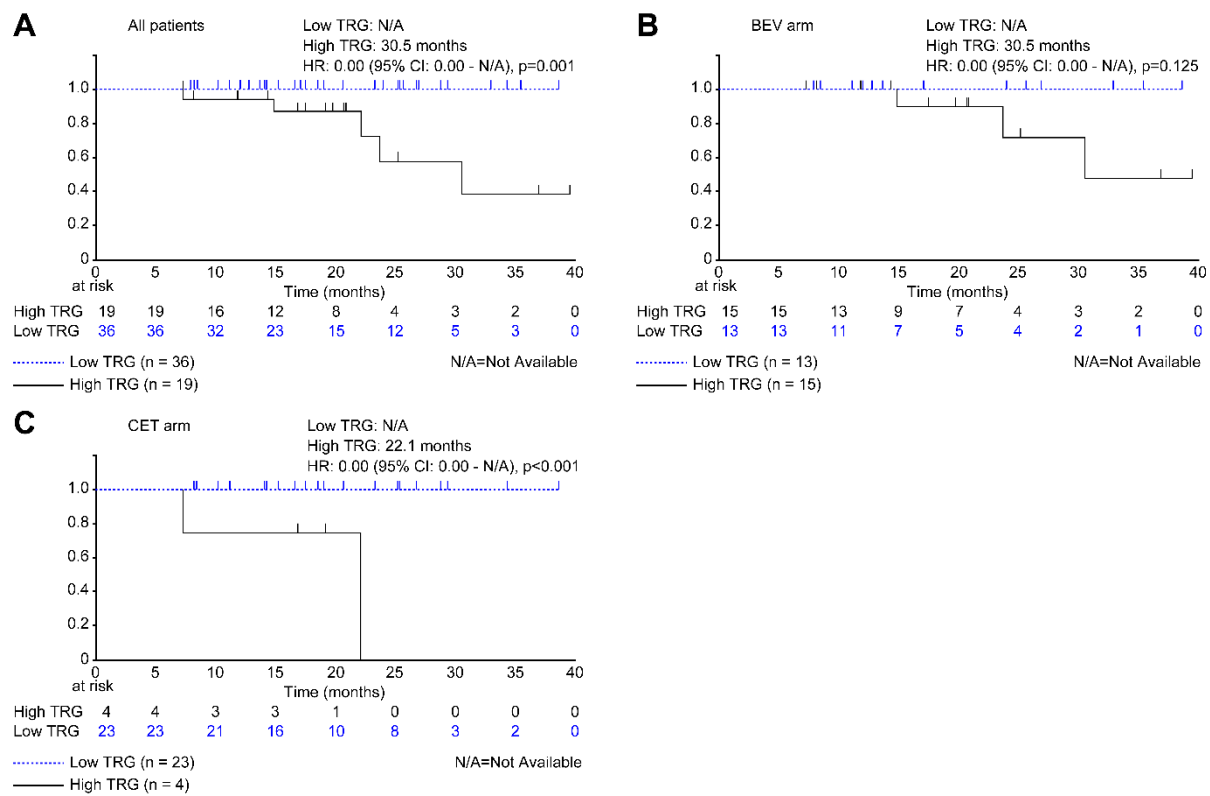

**Supplementary Figure S2.** Kaplan–Meier curves for overall survival (OS) based on the tumor regression grade (TRG) among all patients (A), patients in the bevacizumab (BEV) arm (B), and patients in the cetuximab (CET) arm (C).

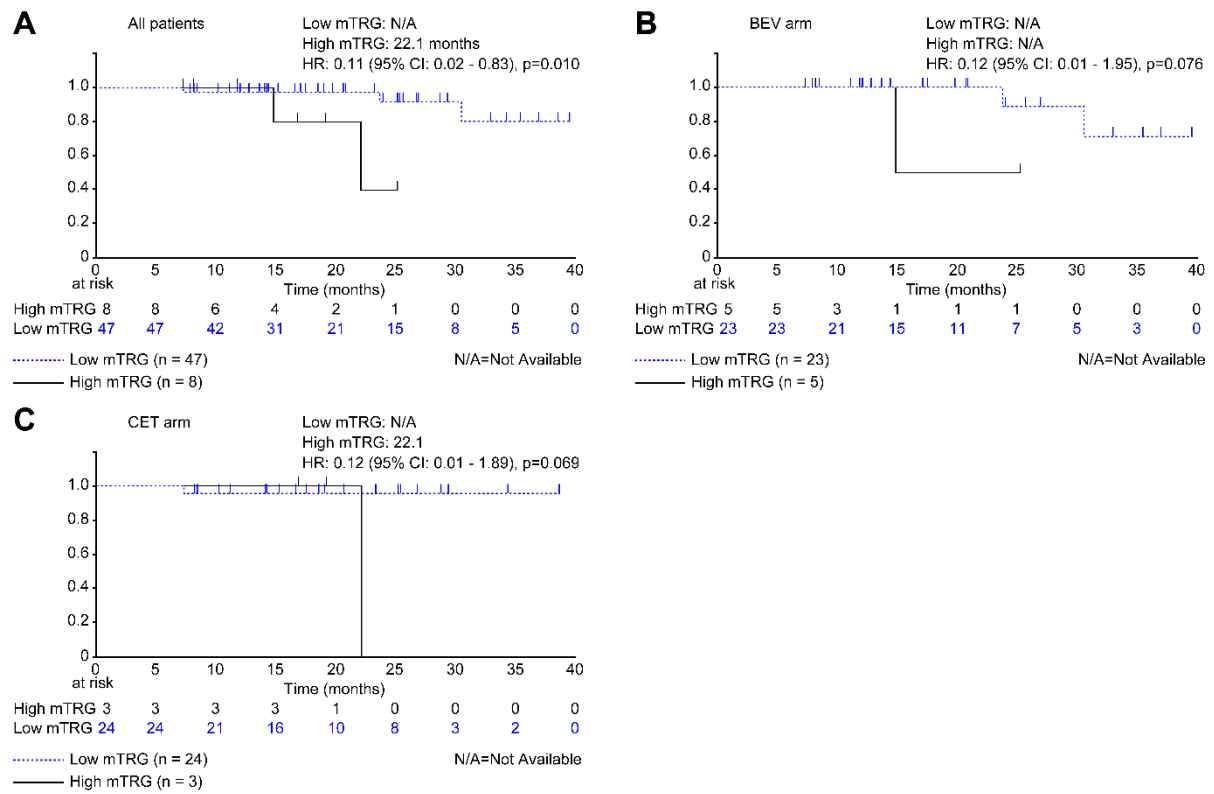

**Supplementary Figure S3.** Kaplan–Meier curves for overall survival (OS) based on the modified tumor regression grade (mTRG) among all patients (A), patients in the bevacizumab (BEV) arm (B), and patients in the cetuximab (CET) arm (C).

BEV arm : 6.5 months  
 CET arm: 13.8 months  
 HR: 0.576 (95% CI: 0.286 - 1.157 ), p = 0.1155

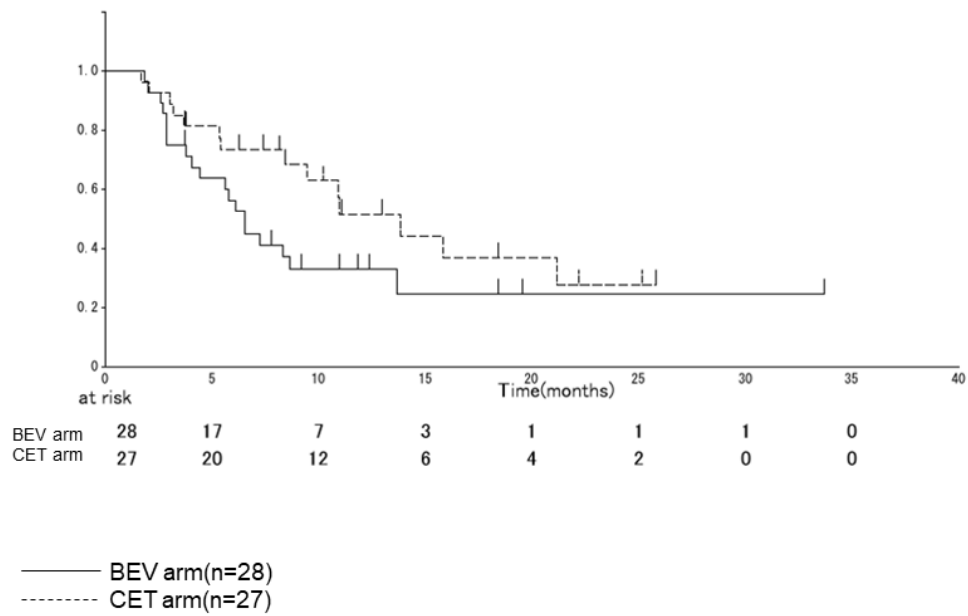

**Supplementary Figure S4.** RFS after hepatectomy

**Supplementary Table S1.** Pathological assessment of tumor regression grade (TRG), modified tumor regression grade (mTRG), dangerous halo (DH), and sinusoidal obstruction syndrome (SOS)

| Tumor regression grade (TRG)                                                                                                                                                                                                                    |                                                                                                                                   |
|-------------------------------------------------------------------------------------------------------------------------------------------------------------------------------------------------------------------------------------------------|-----------------------------------------------------------------------------------------------------------------------------------|
| TRG1                                                                                                                                                                                                                                            | no viable tumor cells; area replaced by fibrosis                                                                                  |
| TRG2                                                                                                                                                                                                                                            | mostly abundant fibrosis with a small number of viable tumor cells                                                                |
| TRG3                                                                                                                                                                                                                                            | predominantly fibrosis with more viable tumor cells than in TRG2; tumor cells less than fibrosis                                  |
| TRG4                                                                                                                                                                                                                                            | more tumor cells than fibrosis                                                                                                    |
| TRG5                                                                                                                                                                                                                                            | only viable tumor cells                                                                                                           |
| Modified tumor regression grade (mTRG)*                                                                                                                                                                                                         |                                                                                                                                   |
| mTRG1                                                                                                                                                                                                                                           | no viable tumor cells; area replaced by fibrosis/ILN                                                                              |
| mTRG2                                                                                                                                                                                                                                           | mostly abundant fibrosis and ILN with a small number of viable tumor cells                                                        |
| mTRG3                                                                                                                                                                                                                                           | mainly fibrosis and ILN, but a larger number of viable tumor cells when compared to mTRG2; tumor cells less than fibrosis and ILN |
| mTRG4                                                                                                                                                                                                                                           | more tumor cells than fibrosis and ILN                                                                                            |
| mTRG5                                                                                                                                                                                                                                           | only viable tumor cells                                                                                                           |
| *mTRG considers the presence of infarct-like necrosis (ILN), which is caused by chemotherapy and presents as eosinophilic homogenous necrosis with no nuclear debris, which is surrounded by hyalinized fibrosis with histiocytic infiltration. |                                                                                                                                   |
| Dangerous halo (DH)†                                                                                                                                                                                                                            |                                                                                                                                   |
| absent                                                                                                                                                                                                                                          | no cluster of tumor cells                                                                                                         |
| rare                                                                                                                                                                                                                                            | scattered tumor cells infiltrating the liver parenchyma for < 10% of the lesion's circumference                                   |
| focal                                                                                                                                                                                                                                           | scattered cells infiltrating the liver parenchyma for 10–50% of the lesion's circumference                                        |
| diffuse                                                                                                                                                                                                                                         | scattered cells infiltrating the liver parenchyma for > 50% of the lesion's circumference                                         |
| †DH is a cluster of tumor cells infiltrating the surrounding liver parenchyma without proliferating in the fibrotic stroma.                                                                                                                     |                                                                                                                                   |
| Sinusoidal obstruction syndrome (SOS)‡                                                                                                                                                                                                          |                                                                                                                                   |
| grade 1                                                                                                                                                                                                                                         | none/mild and localized around the central vein                                                                                   |
| grade 2                                                                                                                                                                                                                                         | moderate and extends from zone 1 to zone 2                                                                                        |
| grade 3                                                                                                                                                                                                                                         | the lobule is completely and severely involved                                                                                    |

‡SOS shows varying degrees of centrilobular sinusoidal dilatation, congestion, and hemorrhage with atrophy and loss of hepatocytes.

**Supplementary Table S2.** The operative procedure

|                               | All  | BEV  | CET  |
|-------------------------------|------|------|------|
| Operative procedure*          | N=55 | N=28 | N=27 |
| partial hepatectomy           | 41   | 21   | 20   |
| metasectomy                   | 1    | 0    | 1    |
| subsegmentectomy              | 7    | 5    | 2    |
| segmentectomy                 | 16   | 7    | 9    |
| right lobectomy               | 6    | 3    | 3    |
| left lobectomy                | 5    | 3    | 2    |
| left hepatic trisegmentectomy | 2    | 2    | 0    |
| Others                        | 4    | 1    | 3    |

\*Duplicate

**Supplementary Table S3.** Postoperative complications

|                              | All(N=55)  |           | BEV(N=28) |           | CET(N=27) |           |
|------------------------------|------------|-----------|-----------|-----------|-----------|-----------|
| Postoperative complications* | Any        | ≥III      | Any       | ≥III      | Any       | ≥III      |
| Postoperative bleeding       | 1 (1.8%)   | 0         | 1 (3.6%)  | 0         | 0         | 0         |
| Bile leakage                 | 12 (21.8%) | 9 (16.4%) | 5 (17.9%) | 4 (14.3%) | 7 (25.9%) | 5 (18.5%) |
| Intraperitoneal abscess      | 5 (9.1%)   | 3 (5.5%)  | 2 (7.1%)  | 1 (3.6%)  | 3 (11.1%) | 2 (7.4%)  |
| Liver abscess                | 1 (1.8%)   | 0         | 1 (3.6%)  | 0         | 0         | 0         |
| ileus                        | 2 (3.6%)   | 0         | 2 (7.1%)  | 0         | 0         | 0         |
| Others                       | 3 (5.5%)   | 0         | 0         | 0         | 3 (11.1%) | 0         |

\*JCOG Postoperative Complication Criteria according to Clavien-Dindo Classification



**Supplementary Table S4.** Differences in tumor regression grade (TRG), modified tumor regression grade (mTRG), dangerous halo (DH), and sinusoidal obstruction syndrome (SOS)

|      | TRG           |                   |                   |
|------|---------------|-------------------|-------------------|
|      | All<br>(n=55) | BEV arm<br>(n=28) | CET arm<br>(n=27) |
| TRG1 | 1 (1.8%)      | 0 (0%)            | 1 (3.7%)          |
| TRG2 | 15 (27.3%)    | 6 (21.4%)         | 9 (33.3%)         |
| TRG3 | 20 (36.4%)    | 7 (25.0%)         | 13 (48.1%)        |
| TRG4 | 15 (27.3%)    | 12 (42.9%)        | 3 (11.1%)         |
| TRG5 | 4 (7.3%)      | 3 (10.7%)         | 1 (3.7%)          |

  

|       | mTRG          |                   |                   |
|-------|---------------|-------------------|-------------------|
|       | All<br>(n=55) | BEV arm<br>(n=28) | CET arm<br>(n=27) |
| mTRG1 | 1 (1.8%)      | 0 (0%)            | 1 (3.7%)          |
| mTRG2 | 21 (38.2%)    | 12 (42.9%)        | 9 (33.3%)         |
| mTRG3 | 25 (45.5%)    | 11 (39.3%)        | 14 (51.9%)        |
| mTRG4 | 7 (12.7%)     | 5 (17.9%)         | 2 (7.4%)          |
| mTRG5 | 1 (1.8%)      | 0 (0%)            | 1(3.7%)           |

  

|         | DH            |                   |                   |
|---------|---------------|-------------------|-------------------|
|         | All<br>(n=55) | BEV arm<br>(n=28) | CET arm<br>(n=27) |
| Absent  | 14 (25.5%)    | 4 (14.3%)         | 10 (37.0%)        |
| Rare    | 19 (34.5%)    | 10 (35.7%)        | 9 (33.3%)         |
| Focal   | 13 (23.6%)    | 6 (21.4%)         | 7 (25.9%)         |
| Diffuse | 9 (16.4%)     | 8 (28.6%)         | 1 (3.7%)          |

  

| SOS     |               |                   |                   |
|---------|---------------|-------------------|-------------------|
|         | All<br>(n=55) | BEV arm<br>(n=28) | CET arm<br>(n=27) |
| Grade 3 | 0             | 0                 | 0                 |
| Grade 2 | 5 (9.1%)      | 0                 | 5 (18.5%)         |
| Grade 1 | 50 (90.9%)    | 28 (100%)         | 22 (81.5%)        |

TRG, tumor regression grade; mTRG, modified TRG; DH, dangerous halo; SOS, sinusoidal obstruction syndrome; BEV, bevacizumab; CET, cetuximab;

**Supplementary Table S5.** Relationships between pathological response (TRG) and radiological response (RECIST)

| TRG          | CR<br>n (%) | PR<br>n (%) | SD<br>n (%) | PD<br>n (%) | NE<br>n (%) | n (%) [95% CI]            | Fisher's exact<br>test |
|--------------|-------------|-------------|-------------|-------------|-------------|---------------------------|------------------------|
| All patients |             |             |             |             |             |                           |                        |
| Low TRG      | 0 (0.0%)    | 36 (100.0%) | 0 (0.0%)    | 0 (0.0%)    | 0 (0.0%)    | 36 (100.0% [90.3–100.0%]) | <0.001                 |
| High TRG     | 0 (0.0%)    | 11 (57.9%)  | 8 (42.1%)   | 0 (0.0%)    | 0 (0.0%)    | 11 (57.9% [33.5–79.7%])   |                        |
| BEV arm      |             |             |             |             |             |                           |                        |
| Low TRG      | 0 (0.0%)    | 13 (100.0%) | 0 (0.0%)    | 0 (0.0%)    | 0 (0.0%)    | 13 (100.0% [75.3–100.0%]) | 0.0025                 |
| High TRG     | 0 (0.0%)    | 7 (46.7%)   | 8 (53.3%)   | 0 (0.0%)    | 0 (0.0%)    | 7 (46.7% [21.3–73.4%])    |                        |
| CET arm      |             |             |             |             |             |                           |                        |
| Low TRG      | 0 (0.0%)    | 23 (100.0%) | 0 (0.0%)    | 0 (0.0%)    | 0 (0.0%)    | 23 (100.0% [85.2–100.0%]) | 0.1412                 |
| High TRG     | 0 (0.0%)    | 4 (100.0%)  | 0 (0.0%)    | 0 (0.0%)    | 0 (0.0%)    | 4 (100.0% [39.8–100.0%])  |                        |

BEV, bevacizumab; CET, cetuximab; CI, confidence interval; CR, complete response; High TRG, TRG grades 4–5 (> 50% viable tumor cells); Low TRG, TRG grades 1–3 (≤ 50% viable tumor cells); NE, not evaluable; PD, progressive disease; PR, partial response; RECIST, Response Evaluation Criteria in Solid Tumors; SD, stable disease; TRG, tumor regression grade

**Supplementary Table S6.** Relationships between pathological response (mTRG) and radiological response (RECIST)

| mTRG         | CR<br>n (%) | PR<br>n (%)    | SD<br>n (%) | PD<br>n (%) | NE<br>n (%) | N (% [95% CI])                | Fisher's exact<br>test |
|--------------|-------------|----------------|-------------|-------------|-------------|-------------------------------|------------------------|
| All patients |             |                |             |             |             |                               |                        |
| Low mTRG     | 0 (0.0%)    | 40 (85.1%)     | 7 (14.9%)   | 0 (0.0%)    | 0 (0.0%)    | 40 (85.1% [71.7–93.8%])       | 1.0000                 |
| High mTRG    | 0 (0.0%)    | 7 (87.5%)      | 1 (12.5%)   | 0 (0.0%)    | 0 (0.0%)    | 7 (87.5% [47.3–99.7%])        |                        |
| BEV arm      |             |                |             |             |             |                               |                        |
| Low mTRG     | 0 (0.0%)    | 16 (69.6%)     | 7 (30.4%)   | 0 (0.0%)    | 0 (0.0%)    | 16 (69.6% [47.1–86.8%])       | 1.0000                 |
| High mTRG    | 0 (0.0%)    | 4 (80.0%)      | 1 (20.0%)   | 0 (0.0%)    | 0 (0.0%)    | 4 (80.0% [28.4–99.5%])        |                        |
| CET arm      |             |                |             |             |             |                               |                        |
| Low mTRG     | 0 (0.0%)    | 24<br>(100.0%) | 0 (0.0%)    | 0 (0.0%)    | 0 (0.0%)    | 24 (100.0% [85.8–<br>100.0%]) | 0.0084                 |
| High mTRG    | 0 (0.0%)    | 3 (100.0%)     | 0 (0.0%)    | 0 (0.0%)    | 0 (0.0%)    | 3 (100.0% [29.2–100.0%])      |                        |

BEV, bevacizumab; CET, cetuximab; CI, confidence interval; CR, complete response; High mTRG, mTRG grades 4–5 (> 50% viable tumor cells); Low mTRG, mTRG grades 1–3 (≤ 50% viable tumor cells); mTRG, modified tumor regression grade; NE, not evaluable; PD, progressive disease; PR, partial response; RECIST, Response Evaluation Criteria in Solid Tumors; SD, stable disease
